# Supplementary material
Source: publisher figshare collection journal article supplement (https://acs.figshare.com/ndownloader/files/13525931)
Supplement: Supplementary file 1 [file 13525931]

Supporting Information

# Topological Insulator-Based van der Waals Heterostructures for Effective Control of Massless and Massive Dirac Fermions

*Su Kong Chong<sup>1</sup>, Kyu Bum Han<sup>2</sup>, Akira Nagaoka<sup>2,3</sup>, Ryuichi Tsuchikawa<sup>1</sup>, Renlong*

*Liu<sup>4,5</sup>, Haoliang Liu<sup>1</sup>, Zeev Valy Vardeny<sup>1</sup>, Dmytro A. Pesin<sup>1</sup>, Changgu Lee<sup>4,5</sup>, Taylor D.*

*Sparks<sup>2</sup> and Vikram V. Deshpande<sup>1\*</sup>*

<sup>1</sup>Department of Physics and Astronomy, University of Utah, Salt Lake City, Utah 84112

USA

<sup>2</sup>Department of Materials Science and Engineering, University of Utah, Salt Lake City,

Utah 84112 USA

<sup>3</sup>Department of Materials Science and Engineering, Kyoto University, Kyoto 606-8501,

Japan

<sup>4</sup>Department of Mechanical Engineering, Sungkyunkwan University, 2066, Seobu-ro, Jangan-gu, Suwon, Gyeonggi, 16419, Republic of Korea

<sup>5</sup>SKKU Advanced Institute of Nanotechnology, Sungkyunkwan University, 2066, Seobu-ro, Jangan-gu, Suwon, Gyeonggi, 16419, Republic of Korea

\*Corresponding author: E-mail: [vdesh@physics.utah.edu](mailto:vdesh@physics.utah.edu); Phone number: 801-581-6570

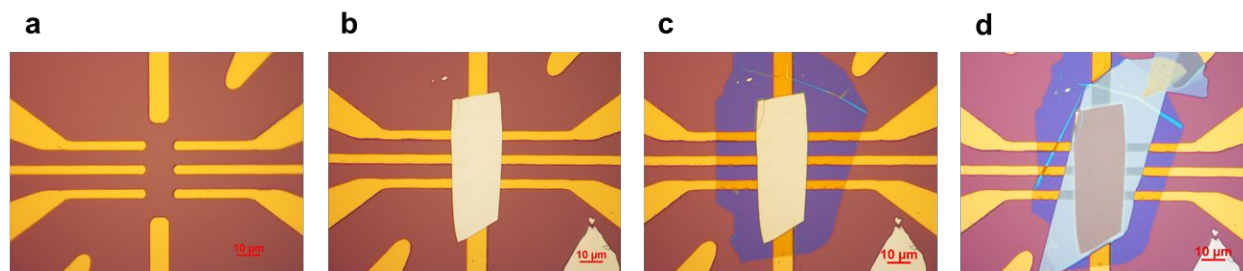

**Figure S1 Device fabrication process.** (a) The gold contact electrodes in Hall bar geometry were fabricated using a standard electron beam lithography on a SiO<sub>2</sub> (300 nm) coated Si substrate. (b) A BSTS flake exfoliated from the single crystal BSTS was transferred onto the pre-patterned electrodes using a home-built micro-manipulation stage. (c) A hBN flake exfoliated from a single crystal hBN was then transferred on the BSTS. (d) A graphite flake was transferred on the hBN at about 95°C with the heating on the Si substrate, and joined to a gate electrode.

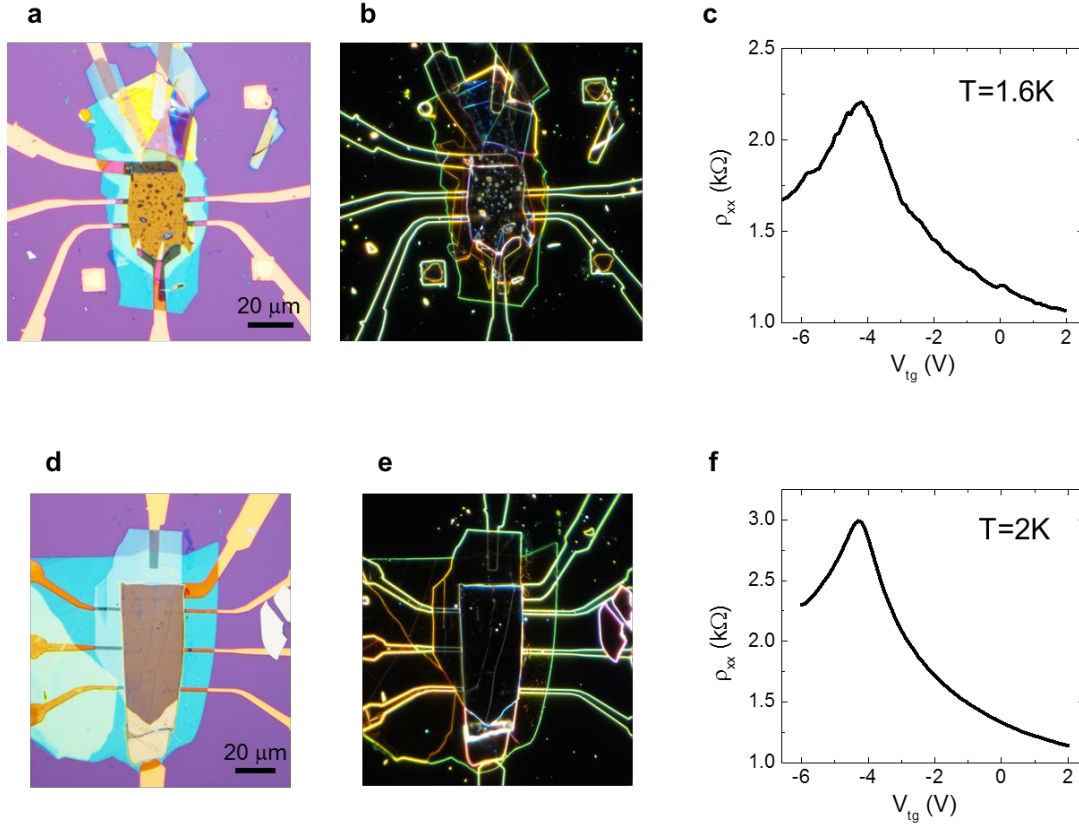

**Figure S2 Effect of heterostructure interfaces on the transport properties.** The representative (a, d) bright-field, and (b, e) dark-field optical images of a BSTS/hBN/graphite heterostructure with the graphite layer transferred at (room temperature, 95°C heating). The blisters formation at the hBN-graphite interface is prevented by the high temperature (close to the vaporization of water) transfer. The (c, f) four-probe resistivities ( $\rho_{xx}$ ) as a function of gate-voltage applied through the graphite gate-electrode for the BSTS (with, without) blisters forming at the hBN-graphite interface. With the same thickness of hBN (28 nm) layer, the sharper  $\rho_{xx}$  peak in (f) is attributed to the cleaner interface of the vdW heterostructure layers, resulting in a higher gating efficiency through the hBN/graphite gate.

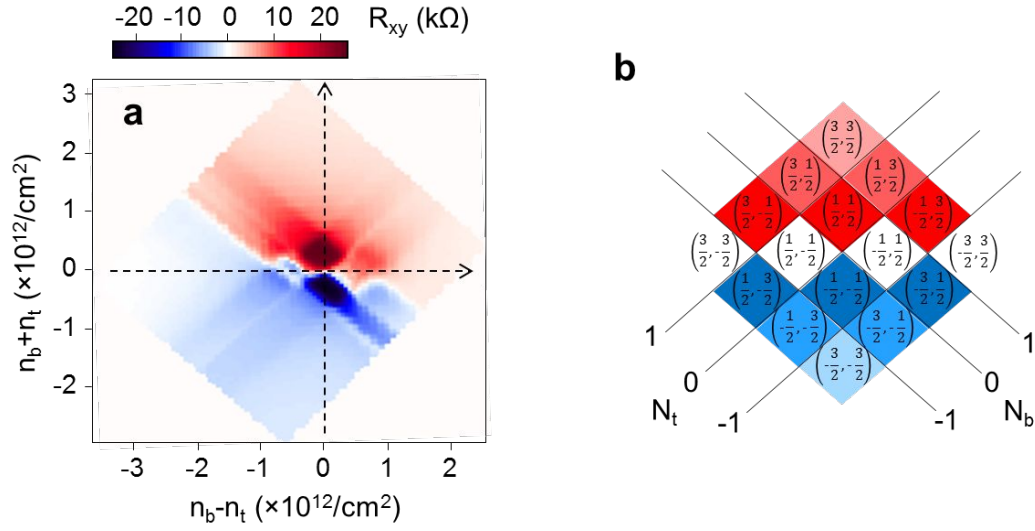

**Figure S3 Quantization of Hall resistance from top and bottom surface states.** (a) 2D color map of the Hall resistance ( $R_{xy}$ ) as a function of sum and difference of the charge densities of the top ( $n_t$ ) and bottom ( $n_b$ ) surfaces. The vertical and horizontal dashed line arrows cross the symmetric and antisymmetric Landau Level filling factors between top ( $\nu_t$ ) and bottom ( $\nu_b$ ) surface states. (b) The quantization in  $R_{xy}$  is illustrated by a Landau level filling color schematic for the top and bottom surface states. The  $(\nu_t, \nu_b)$  of the corresponding Landau level indices of the top ( $N_t$ ) and bottom ( $N_b$ ) surface states are labeled in (b).

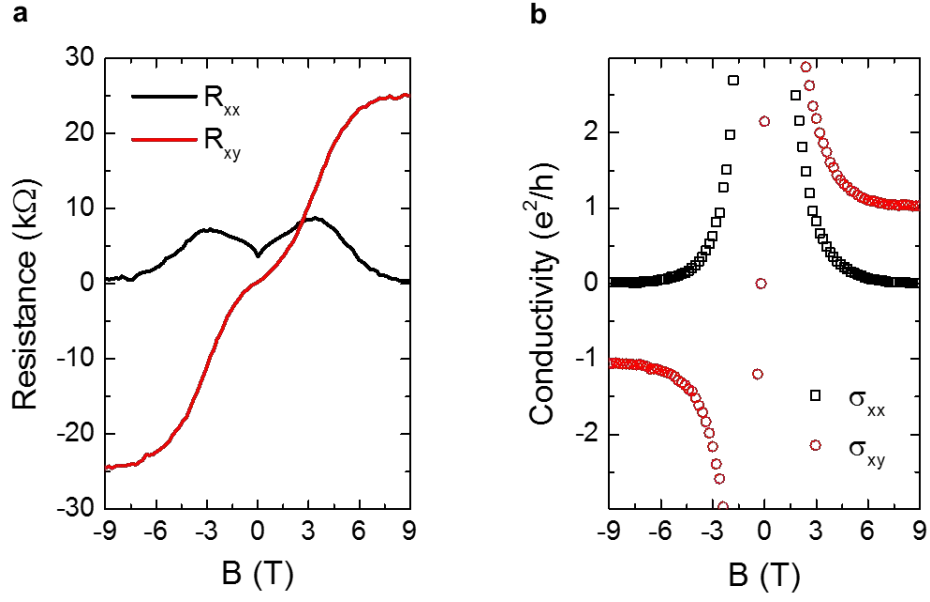

**Figure S4 Magnetic field dependent QHE.** (a)  $R_{xx}$  &  $R_{xy}$ , and (b)  $\sigma_{xx}$  &  $\sigma_{xy}$  as a function of magnetic field for the BSTS/hBN/graphite device. The  $R_{xx}$  ( $\sigma_{xx}$ ) and  $R_{xy}$  ( $\sigma_{xy}$ ) are highly-symmetrical and antisymmetrical, respectively, in opposite magnetic field. The  $\sigma_{xy}$  approaches quantum limit of  $e^2/h$  ( $-e^2/h$ ), together with the vanishing in  $\sigma_{xx}$ , at magnetic field greater than 6T (-6T).

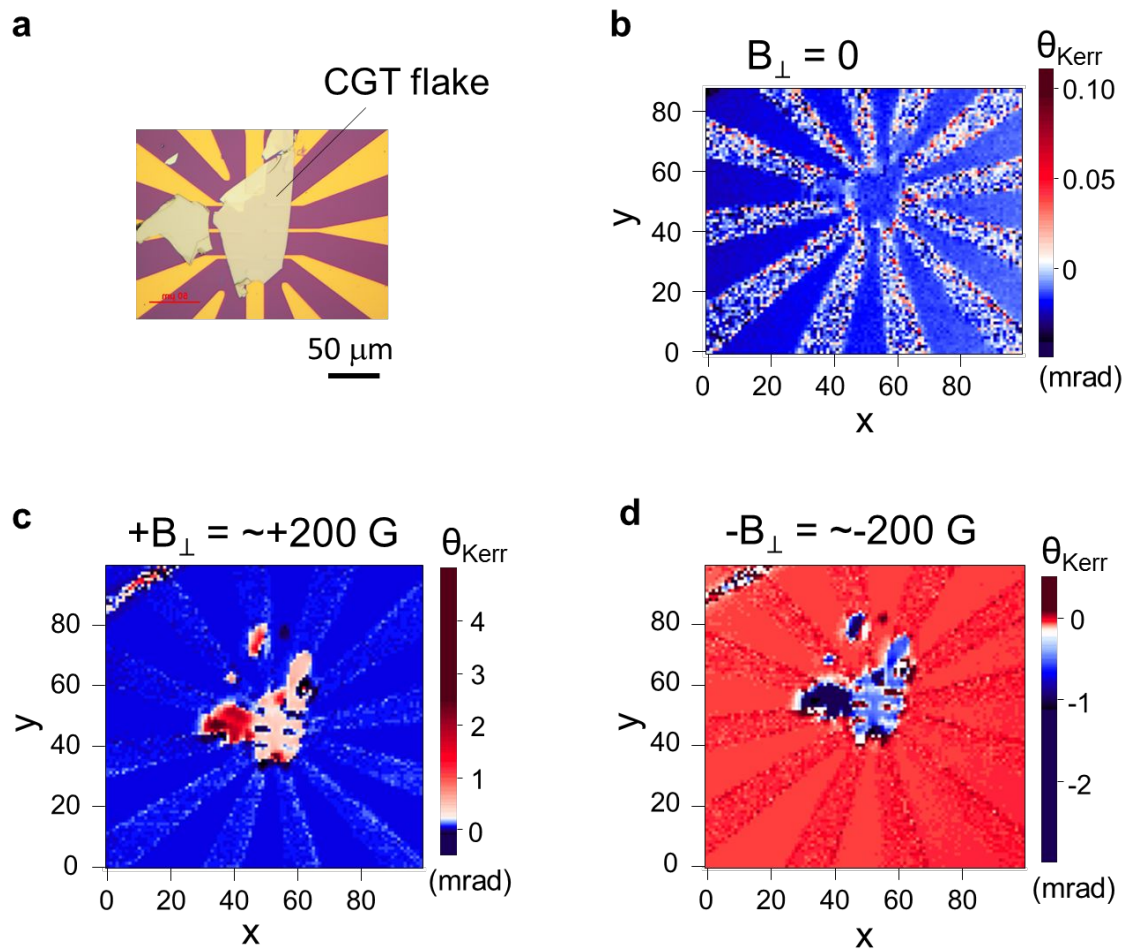

**Figure S5** Kerr rotation studies of a  $\text{Cr}_2\text{Ge}_2\text{Te}_6$  (CGT) flake. The magnetic properties of a 80 nm thick CGT flake (a) were studied using a Sagnac interferometer at cryogenic temperature. 2D spatial mapping of Kerr rotation angles ( $\theta_{\text{Kerr}}$ ) for the CGT device measured at (b) 0 G, (c)  $\sim +200$  G and (d)  $\sim -200$  G out of plane magnetic field. The large  $\theta_{\text{Kerr}}$  detected and the antisymmetrical of  $\theta_{\text{Kerr}}$  in opposite magnetic field confirm its ferromagnetic behavior.

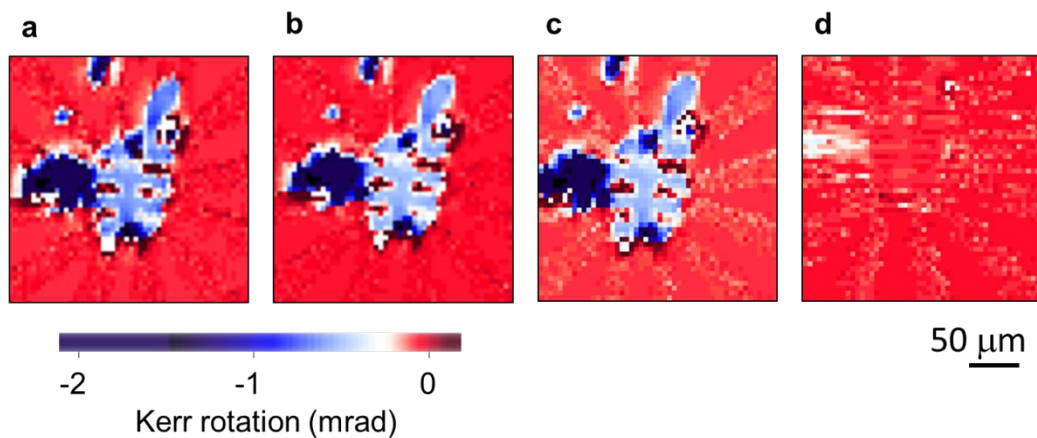

**Figure S6 Temperature dependent Kerr rotation of a CGT flake.** 2D maps of Kerr rotation angle ( $\theta_{\text{Kerr}}$ ) of the 80 nm CGT device measured at different temperature of (a) 4.7 K, (b) 20 K, (c) 60 K and (d) 80 K. The vanishing of  $\theta_{\text{Kerr}}$  at 80 K indicates that the ferromagnetic phase transition occurred at a temperature between 60 to 80 K.



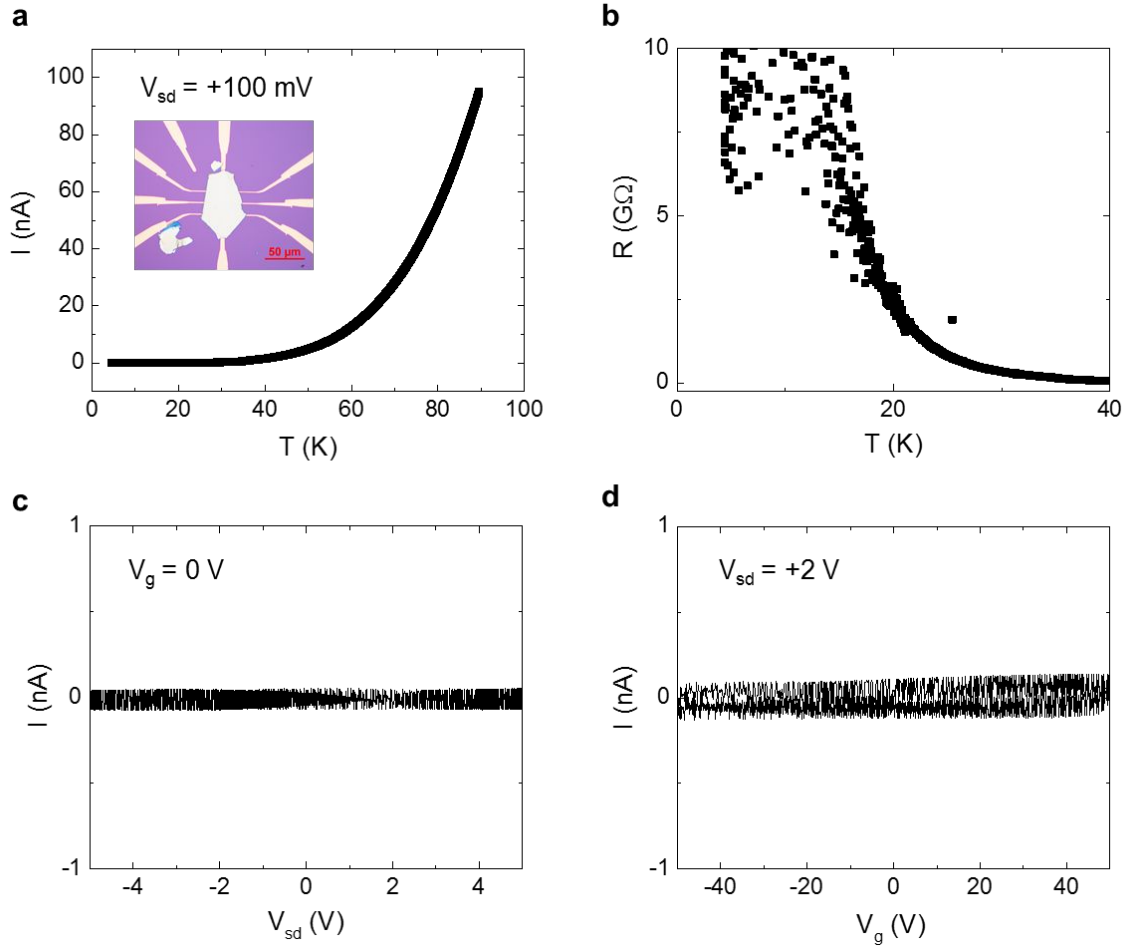

**Figure S7** Transport properties of a single crystal  $\text{Cr}_2\text{Ge}_2\text{Te}_6$  (CGT) flake. (a) Source-drain current ( $I$ ) of a 120 nm CGT device (shown in the inset) as a function of temperature, measured at a fixed source-drain voltage of +100 mV. (b) The resistance ( $R$ ) of the CGT device as a function of temperature shows the insulating behavior with  $R$  exceeding 2  $\text{G}\Omega$  at temperature below 20 K. (c) The source-drain  $I$  versus  $V$  of the CGT device measured at temperature of 4 K. No source-drain  $I$  detected in the range of  $V_{\text{sd}}$  applied ( $\pm 5$  V), showing the truly insulating of the CGT at cryogenic temperature. (d) The source-drain  $I$  as a function of gate voltage ( $V_{\text{g}}$ ) applied through the Si/SiO<sub>2</sub> gate. No source-drain  $I$

detected indicates that the CGT is in the electronic band gap region within the range of  $V_g$  applied.

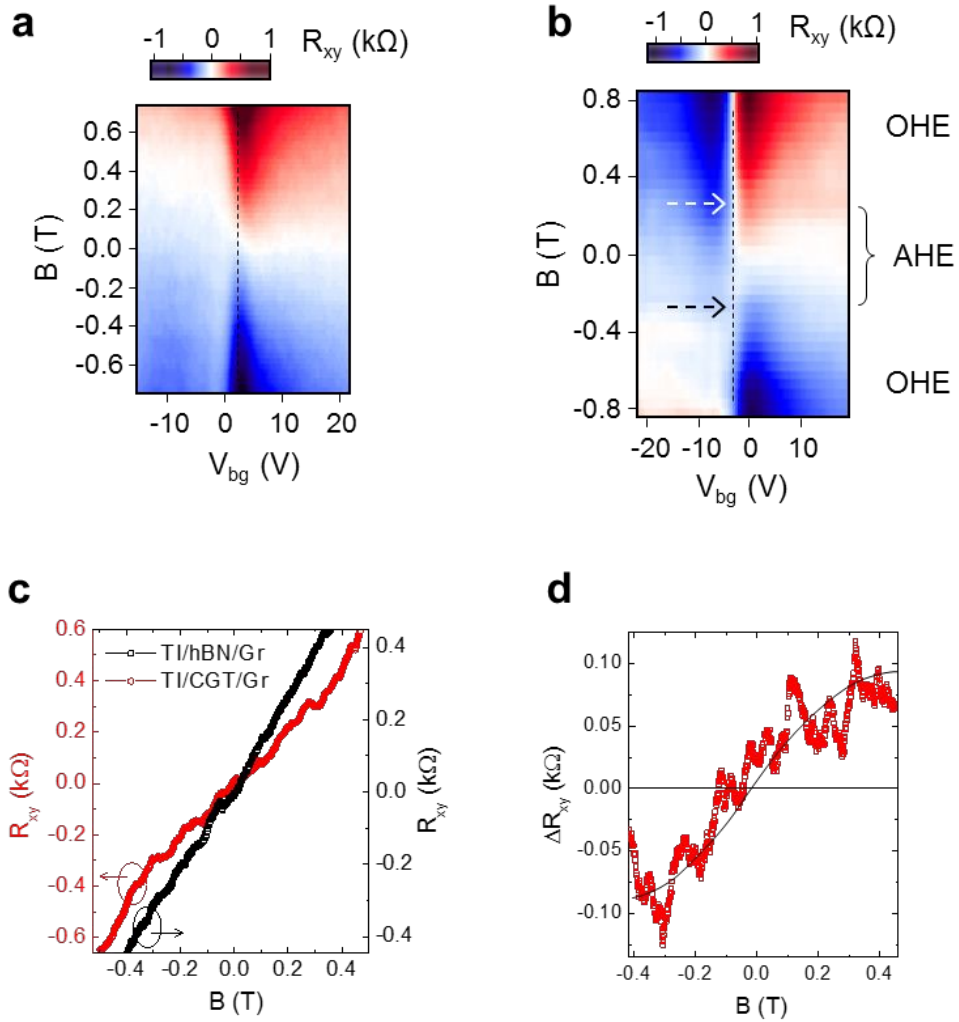

**Figure S8 Anomalous Hall effect of a BSTS/CGT/Gr device.** Color maps of the Hall resistance ( $R_{xy}$ ) of the (a) BSTS/hBN/Gr, and (b) BSTS/CGT/Gr devices as a function of magnetic field and backgate voltage. The ordinary Hall effect (OHE) and anomalous Hall effect (AHE) regions were labeled in the figure. (c) Comparison of the  $R_{xy}$  at low magnetic field ( $\pm 0.5$  T) for the BSTS/hBN/Gr and BSTS/CGT/Gr devices. The different slope of  $R_{xy}$  vs  $B$  in BSTS/CGT/Gr device plot at low magnetic field range of about  $\pm 0.3$  T is a result of the AHE. (d) The difference

between  $R_{xy}$  of BSTS/hBN/Gr and BSTS/CGT/Gr ( $\Delta R_{xy}$ ) as a function of magnetic field. The black curve is a guide to the eyes to show the antisymmetrical of  $\Delta R_{xy}$  in the opposite magnetic field.

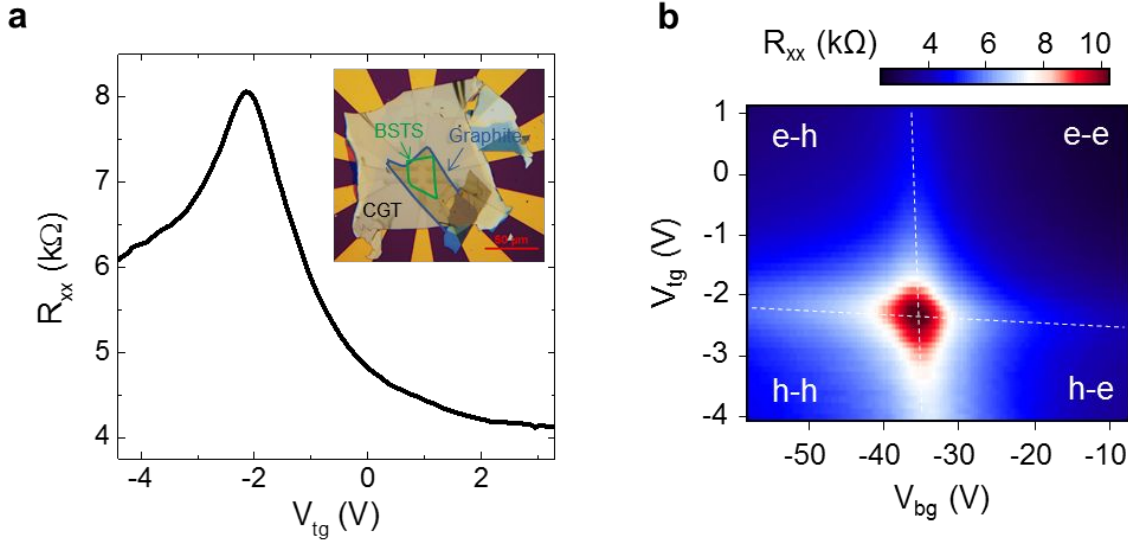

**Figure S9 Gate-dependent resistance of a BSTS/CGT/Gr device.** (a) Four-probe resistance ( $R_{xx}$ ) of the BSTS as a function of  $V_{tg}$  applied through a CGT dielectric (thickness  $\sim 250$  nm) measured at temperature of 1.6 K. Inset in (a) is the optical images of the device. (b) Color plot of the  $R_{xx}$  of the BSTS as a function of dual-gate voltages with the topgate as CGT/graphite and backgate as  $\text{SiO}_2/\text{Si}$ . Similar to the BSTS/hBN/Gr device, the top and bottom surface states can be tuned into the four quadrant conduction as labeled in (b).

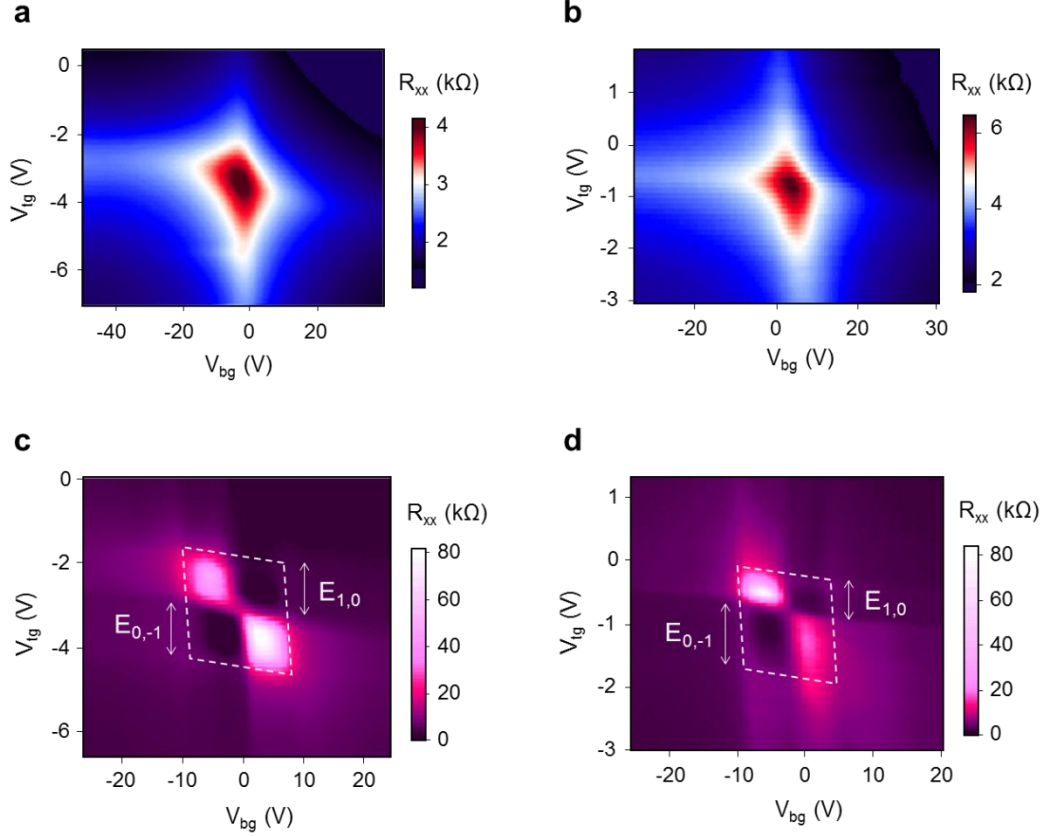

**Figure S10 Estimation of the magnetic gap from dual-gated transport.** Dual-gated color maps of longitudinal resistance ( $R_{xx}$ ) for (a, c) BSTS/hBN/Gr\_2, and (b, d) BSTS/CGT/Gr\_2 devices measured at magnetic field of 0 and 9T. The thickness of the hBN and CGT layers are about 20 nm and 200 nm, respectively. Different from the hBN/Gr gating, the top surface tuned by CGT/Gr shows an irregular LL spacing between  $N_t=-1$  to 0 and  $N_t=0$  to +1. The magnetic exchange gap induced by the 2D ferromagnet CGT is evaluated from the difference between the  $E_{0,-1}$  and  $E_{1,0}$  LL spacing. The  $E_{1,0}$  is calculated from the LL energy,  $E_1 - E_0 = \sqrt{2e\hbar v_F^2 B} \approx 34.8$  meV, where the Fermi velocity ( $v_F$ ) is  $\sim 3.2 \times 10^5$  m/s. The  $E_{0,-1}$  is expressed as  $E_{0,-1} = E_{-1} - E_0 + \Delta$ , where  $E_{-1} = E_1$  and  $\Delta$  is the magnetic exchange gap. The  $\Delta$  is estimated to be about 18 meV.

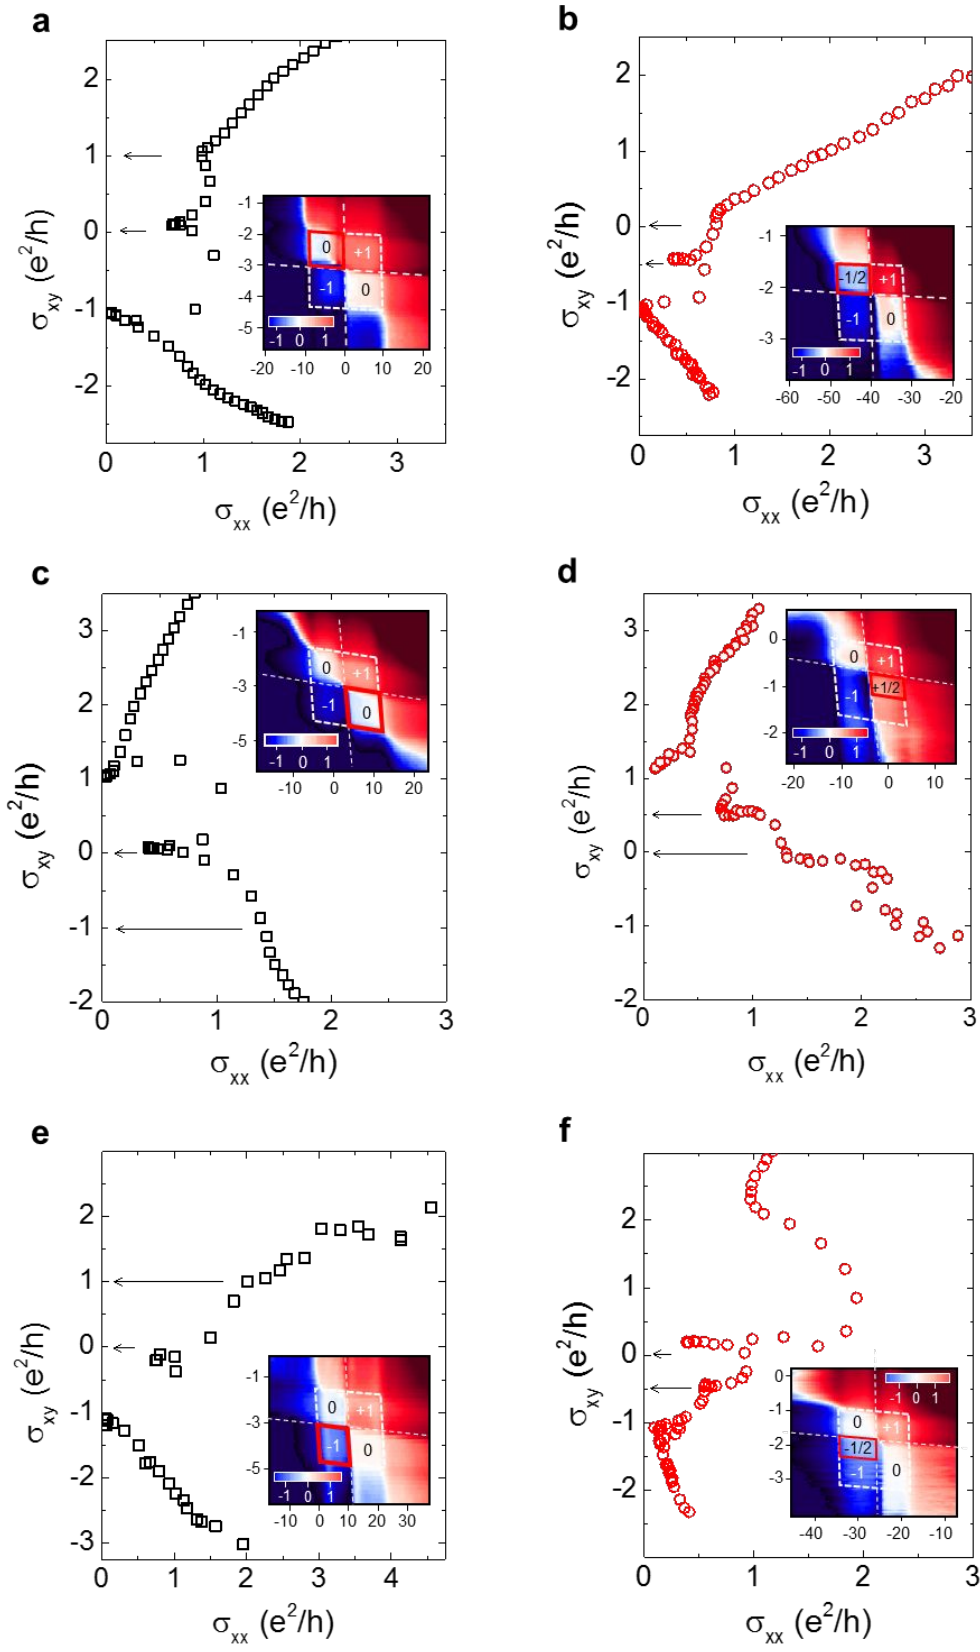

**Figure S11 Renormalization group flow plots for various BSTS devices.** The  $\sigma_{xy}$  versus  $\sigma_{xx}$  plots for three BSTS/hBN/Gr devices (a) BSTS/hBN/Gr\_1, (c) BSTS/hBN/Gr\_2, and (e) BSTS/hBN/Gr\_3, and three BSTS/CGT/Gr devices (b) BSTS/CGT/Gr\_1, (d) BSTS/CGT/Gr\_2, and (f) BSTS/CGT/Gr\_3, measured at 9T. Thickness of hBN and CGT are in the range of 18-23 nm and 200-300 nm, respectively. The dual-gated  $\sigma_{xy}$  color maps of the respective devices are inserted in the figures. The BSTS/hBN/Gr devices all show regular spaced integer quantum Hall plateaus developed near the center Dirac point. In comparison, the BSTS/CGT/Gr devices display the irregular quantum Hall plateaus with the extended  $\nu = -1$  compared to  $\nu = +1$  plateaus. The half-integer quantization plateau are consistently observed near or in the magnetic gap region in all the CGT-coupled BSTS devices. The renormalization group flow plots in (b), (d) and (f) all show half-integer  $-\frac{1}{2}$  (or  $+\frac{1}{2}$ ) features developed between  $\nu = -1$  (or  $+1$ ) and 0.

**Table S1. Device specifications of the BSTS/hBN/Gr and BSTS/CGT/Gr devices.** The thicknesses of the BSTS ( $d_{\text{BSTS}}$ ), top gate dielectric layers of hBN ( $d_{\text{hBN}}$ ) or CGT ( $d_{\text{CGT}}$ ) flakes are measured using a Bruker Dimension Icon atomic force microscopy.

| Device label  | $d_{\text{BSTS}}$ (nm) | $d_{\text{hBN}}$ (nm) | $d_{\text{CGT}}$ (nm) |
|---------------|------------------------|-----------------------|-----------------------|
| BSTS/hBN/Gr_1 | 100                    | 18                    | -                     |
| BSTS/hBN/Gr_2 | 61                     | 16                    | -                     |
| BSTS/hBN/Gr_3 | 105                    | 22                    | -                     |
| BSTS/hBN/Gr_4 | 80                     | 18                    | -                     |
| BSTS/hBN/Gr_5 | 120                    | 17                    | -                     |
| BSTS/hBN/Gr_6 | 135                    | 20                    | -                     |
| BSTS/CGT/Gr_1 | 112                    | -                     | 160                   |
| BSTS/CGT/Gr_2 | 68                     | -                     | 130                   |
| BSTS/CGT/Gr_3 | 120                    | -                     | 200                   |
